# Supplementary material for: Awareness of Proton Pump Inhibitor Adverse Events and Treatment Pattern Change According to Physician Practice: A National Questionnaire Study in Korea
Source: MDPI journal article supplement (doi:10.3390/jpm14050529), 2024-05-15
Supplement: s1 [file s1]

**1. Please record your age.**

**2. Please select your gender.**

① Man/male ② Woman/female ③ Other / Do not want to respond

**3. Please select the type of institution you are currently working for.**

① Primary clinic ② Secondary hospital ③ Tertiary hospital ④ Others (military service / public institutions)

**4. Please select your training level. If you are a professional, please record your specialized subject and year of acquisition.**

**4-1. If you are an internal medicine specialist, please record the detailed subspecialty.**

**5. Please select the Proton Pump Inhibitor (PPI) you usually prescribe. (Multiple choices available)**

① Omeprazole ② Esomeprazole ③ Pantoprazole ④ Lansoprazole ⑤ Rabeprazole ⑥ Dextansoprazole ⑦ PPI + NSAIDs compounds

**6. How many patients do you prescribe proton pump inhibitor (PPI) on average per week?**

① < 5 ② 5-25 ③ 26-50 ④ 51-100 ⑤ > 100

**7. In what diseases do you usually prescribe proton pump inhibitor (PPI)? (Multiple choices available)**

① Gastroesophageal reflux disease

② Peptic ulcer disease

③ Bone and joint diseases

④ Prevention of gastrointestinal bleeding in the treatment of antiplatelet drugs and anticoagulants

⑤ Others

**8. How long is the Proton Pump Inhibitor (PPI) prescribed in practice (maximum duration)?**

① < 1 month ② 1-2 months ③ 2-4 months ④ 4-6 months ⑤ > 6 months

**9. Are you aware of the adverse effects of proton pump inhibitor (PPI)? ( )**

① Not knowing at all ② Not familiar with ③ In general knowledge ④ Well-informed

**10. How much do you consider possible adverse effects when prescribing proton pump inhibitor (PPI)?**

① Never ② Sometimes ③ Usually ④ Always

**11. Do you explain to the patient the risk of side effects when prescribing Proton Pump Inhibitor (PPI)?**

① Never ② Sometimes ③ Usually ④ Always

**12. Has the patient ever expressed concern about adverse effects when prescribing proton pump inhibitor (PPI)?**

① Never ② Rarely ③ From time to time ④ Often

**13. Please indicate how much you are concerned about each of the following items that have been reported as side effects of Proton Pump Inhibitor (PPI).**

|                                        | <b>0<br/>Never</b> | <b>1<br/>Slightly</b> | <b>2<br/>Somewhat</b> | <b>3<br/>Considerably</b> | <b>4<br/>Highly</b> |
|----------------------------------------|--------------------|-----------------------|-----------------------|---------------------------|---------------------|
| Gastric cancer                         |                    |                       |                       |                           |                     |
| Liver diseases                         |                    |                       |                       |                           |                     |
| <i>Clostridium difficile</i> infection |                    |                       |                       |                           |                     |
| Gastrointestinal infection             |                    |                       |                       |                           |                     |
| Pneumonia                              |                    |                       |                       |                           |                     |
| Bone diseases (osteoporosis,           |                    |                       |                       |                           |                     |

|                                                            |  |  |  |  |  |
|------------------------------------------------------------|--|--|--|--|--|
| fracture, Vitamin D deficiency)                            |  |  |  |  |  |
| Neurologic diseases (Cognitive impairment, dementia)       |  |  |  |  |  |
| Vascular diseases (interaction with antithrombotic agents) |  |  |  |  |  |
| Acute kidney injury (interstitial nephritis)               |  |  |  |  |  |
| Chronic kidney disease                                     |  |  |  |  |  |
| Iron deficiency anemia                                     |  |  |  |  |  |
| Vitamin B <sub>12</sub> deficiency                         |  |  |  |  |  |
| Hypomagnesemia                                             |  |  |  |  |  |

**14. Please indicate how much you think there is a medical causal relationship with the administration of PPI in each of the following items that have been reported as side effects of Proton Pump Inhibitor (PPI).**

|                                                              | <b>0<br/>Never</b> | <b>1<br/>Slightly</b> | <b>2<br/>Somewhat</b> | <b>3<br/>Considerably</b> | <b>4<br/>Highly</b> |
|--------------------------------------------------------------|--------------------|-----------------------|-----------------------|---------------------------|---------------------|
| Gastric cancer                                               |                    |                       |                       |                           |                     |
| Liver diseases                                               |                    |                       |                       |                           |                     |
| <i>Clostridium difficile</i> infection                       |                    |                       |                       |                           |                     |
| Gastrointestinal infection                                   |                    |                       |                       |                           |                     |
| Pneumonia                                                    |                    |                       |                       |                           |                     |
| Bone diseases (osteoporosis, fracture, Vitamin D deficiency) |                    |                       |                       |                           |                     |
| Neurologic diseases (Cognitive impairment, dementia)         |                    |                       |                       |                           |                     |
| Vascular diseases (interaction with antithrombotic agents)   |                    |                       |                       |                           |                     |
| Acute kidney injury (interstitial nephritis)                 |                    |                       |                       |                           |                     |
| Chronic kidney disease                                       |                    |                       |                       |                           |                     |
| Iron deficiency anemia                                       |                    |                       |                       |                           |                     |
| Vitamin B <sub>12</sub> deficiency                           |                    |                       |                       |                           |                     |
| Hypomagnesemia                                               |                    |                       |                       |                           |                     |

**15. Do you consider discontinuing or changing the prescription due to side effects of Proton Pump Inhibitor (PPI)?**

① Never ② Sometimes ③ Usually ④ Always

**15-1. How do you usually change your prescription if you are concerned about the side effects of long-term administration?**

- ① PPI dose reduction (e.g., Esomeprazole 40 mg Q.D. to 20 mg Q.D.)
- ② Adjust the interval between PPIs (e.g., every 2 or 3 days)
- ③ Change to on-demand therapy
- ④ Switch to H<sub>2</sub> receptor blocker
- ⑤ Discontinuation of medication
